# Supplementary material for: Diagnostic accuracy of rapid antigen tests in asymptomatic and presymptomatic close contacts of individuals with confirmed SARS-CoV-2 infection: cross sectional study
Source: PubMed Central journal article supplement — BMJ. 2021 Jul 27;374:n1676. doi: 10.1136/bmj.n1676 (PMC8314145; doi:10.1136/bmj.n1676), 2021-07-27
Supplement: sche065679.ww1.pdf [file sche065679.ww1.pdf]

1 Supplementary Appendix of

2

3 **Diagnostic accuracy of rapid antigen tests in asymptomatic and presymptomatic close**  
4 **contacts of individuals with confirmed SARS-CoV-2 infection: cross sectional study**

5

6 E Schuit, IK Veldhuijzen, RP Venekamp, W van den Bijllaardt, SD Pas, EB Lodder, R  
7 Molenkamp, CH GeurtsvanKessel, J. Velzing, RC Huisman, L Brouwer, T Boelsums, GJ Sips,  
8 KSM Benschop, L Hooft, JHHM van de Wijgert, S van den Hof, KGM Moons

9

10

11

12 **Table of contents**

13

**Table S1** Baseline characteristics of pre-/asymptomatic close contacts of individuals 2  
with a confirmed SARS-CoV-2 infection.

**Table S2** Two-by-two tables used in primary and secondary analysis to determine 3  
diagnostic accuracy parameters of the Veritor System (Beckton Dickinson) rapid  
antigen test

**Table S3** Two-by-two tables used in primary and secondary analysis to determine 4  
diagnostic accuracy parameters of the Biosensor (Roche Diagnostics) rapid antigen  
test

**Supplementary Figure 1** Diagnostic accuracy parameters of Ag-RDTs in 5  
asymptomatic close contacts, i.e., without symptoms at sampling for different viral  
load cut-offs.

**Supplementary Material 1:** short questionnaire (translated from Dutch) 6  
3-item questionnaire 6  
5-item questionnaire 7

**Supplementary Material 2:** Specimen collection, SARS-CoV-2 diagnostic 8  
testing, and SARS-CoV-2 virus culture procedures

**References** 10

14

15

16

17 **Table S1 Baseline characteristics of pre-/asymptomatic close contacts of individuals with a confirmed**  
 18 **SARS-CoV-2 infection.**

|                                                                                       | Stratified by rapid antigen test |                       |
|---------------------------------------------------------------------------------------|----------------------------------|-----------------------|
|                                                                                       | Veritor                          | Biosensor             |
|                                                                                       | N = 2,678                        | N = 1,596             |
| Age [years], mean (SD)                                                                | 45.9 (17.6)                      | 40.7 (16.4)           |
| Gender, female n (%)                                                                  | 1,370 (51.3)                     | 751 (47.3)            |
| Time interval between last contact and sampling [days], median (IQR), range (min-max) | 5 (5 to 5), (0 to 13)            | 5 (5 to 5), (0 to 11) |
| Symptoms at time of sampling, n (%)                                                   | 219 (8.6)                        | 158 (10.1)            |
| Symptom onset, n (%)*                                                                 | N = 219                          | N = 158               |
| At day of sampling                                                                    | 17 (7.8)                         | 14 (8.9)              |
| A day before sampling                                                                 | 64 (29.2)                        | 37 (23.4)             |
| Two days before sampling                                                              | 51 (23.3)                        | 39 (24.7)             |
| Three or more days before sampling                                                    | 83 (37.9)                        | 45 (28.5)             |
| Unknown                                                                               | 4 (1.8)                          | 23 (14.6)             |
| Type of symptoms (self-reported), n (%)*#                                             | N = 219                          | N = 158               |
| Common cold                                                                           | 167 (76.3)                       | 123 (77.8)            |
| Shortness of breath                                                                   | 25 (11.4)                        | 12 (7.6)              |
| Fever                                                                                 | 13 (5.9)                         | 9 (5.7)               |
| Coughing                                                                              | 60 (27.4)                        | 24 (15.2)             |
| Loss of taste or smell                                                                | 6 (2.7)                          | 5 (3.2)               |
| Muscle ache                                                                           | 18 (8.2)                         | 5 (3.2)               |
| Other symptoms                                                                        | 16 (7.3)                         | 15 (9.5)              |

19 IQR = inter quartile range; min=minimum; max=maximum; SD=standard deviation.

20 In the Netherlands, individuals are notified of a close contact by the Dutch public health service test-and-trace  
 21 program, and/or the Dutch contact tracing mobile phone application (the CoronaMelder app) and/or an  
 22 individual with a confirmed SARS-CoV-2 infection (index case).

23 \* percentage calculated as proportion of those with symptoms at time of sampling

24 # totals add up to a number higher than the number of individuals with symptoms at the time of sampling because  
 25 individuals could report more than one symptom.

26

27

28 **Table S2 Two-by-two tables used in primary and secondary analysis to determine diagnostic accuracy**  
 29 **parameters of the Veritor System (Beckton Dickinson) rapid antigen test. An Excel file was added as a**  
 30 **supplement that allows the calculation of 2x2 tables based on the diagnostic accuracy of both Ag-RDTs**  
 31 **with differing prevalence or sample size.**

| Primary analysis                                                               |                |                | RT-PCR test + | RT-PCR test - | Total |
|--------------------------------------------------------------------------------|----------------|----------------|---------------|---------------|-------|
|                                                                                |                | Veritor test + | 149           | 9             | 158   |
|                                                                                |                | Veritor test - | 84            | 2,436         | 2,520 |
|                                                                                |                | Total          | 233           | 2,445         | 2,678 |
| Secondary (stratified) analysis                                                |                |                | RT-PCR test + | RT-PCR test - | Total |
| Infectiousness viral load cut-off <sup>s</sup>                                 |                | Veritor test + | 137           | 20            | 157   |
|                                                                                |                | Veritor test - | 15            | 2,505         | 2,520 |
|                                                                                |                | Total          | 152           | 2,525         | 2,677 |
| Symptoms at sampling <sup>#</sup>                                              | Yes            | Veritor test + | 32            | 1             | 33    |
|                                                                                |                | Veritor test - | 6             | 180           | 186   |
|                                                                                |                | Total          | 38            | 181           | 219   |
|                                                                                | No             | Veritor test + | 105           | 8             | 113   |
|                                                                                |                | Veritor test - | 74            | 2,130         | 2,204 |
|                                                                                |                | Total          | 179           | 2,138         | 2,317 |
| Interval between sampling and last contact with index case [days] <sup>@</sup> |                |                | RT-PCR test + | RT-PCR test - | Total |
| < 5                                                                            | Veritor test + | 39             | 1             | 40            |       |
|                                                                                | Veritor test - | 17             | 322           | 339           |       |
|                                                                                | Total          | 56             | 323           | 379           |       |
| 5                                                                              | Veritor test + | 53             | 1             | 54            |       |
|                                                                                | Veritor test - | 32             | 1,217         | 1,249         |       |
|                                                                                | Total          | 85             | 1,218         | 1,303         |       |
| > 5                                                                            | Veritor test + | 26             | 4             | 30            |       |
|                                                                                | Veritor test - | 20             | 461           | 481           |       |
|                                                                                | Total          | 46             | 465           | 511           |       |

32 <sup>#</sup> Symptoms were not available from 142 individuals

33 <sup>s</sup> The viral load cut-off for infectiousness, defined as the viral load above which 95% of RT-PCR test positives  
 34 had a positive culture, was 5.2 log<sub>10</sub> E gene copies/mL. Viral load was unavailable for one Veritor-tested  
 35 individual with a positive RT-PCR test result.

36 <sup>@</sup> The interval between the moment of sampling and the last contact with an index case was not available for 488  
 37 individuals, mainly because this question was added to the questionnaire later in study.

38

39 **Table S3 Two-by-two tables used in primary and secondary analysis to determine diagnostic accuracy**  
 40 **parameters of the Biosensor (Roche Diagnostics) rapid antigen test. An Excel file was added as a**  
 41 **supplement that allows the calculation of 2x2 tables based on the diagnostic accuracy of both Ag-RDTs**  
 42 **with differing prevalence or sample size.**

|                                                                                |                  |                  |               |               |       |
|--------------------------------------------------------------------------------|------------------|------------------|---------------|---------------|-------|
| <u>Primary analysis</u>                                                        |                  |                  | RT-PCR test + | RT-PCR test - | Total |
|                                                                                |                  | Biosensor test + | 83            | 8             | 91    |
|                                                                                |                  | Biosensor test - | 49            | 1,456         | 1,505 |
|                                                                                |                  | Total            | 132           | 1,464         | 1,596 |
| <u>Secondary (stratified) analysis</u>                                         |                  |                  |               |               |       |
| Infectiousness viral load cut-off <sup>s</sup>                                 |                  |                  | RT-PCR test + | RT-PCR test - | Total |
|                                                                                |                  | Biosensor test + | 79            | 12            | 91    |
|                                                                                |                  | Biosensor test - | 12            | 1,493         | 1,505 |
|                                                                                |                  | Total            | 91            | 1,505         | 1,596 |
| Symptoms at sampling <sup>#</sup>                                              | Yes              | Biosensor test + | RT-PCR test + | RT-PCR test - | Total |
|                                                                                |                  | 22               | 2             | 24            |       |
|                                                                                |                  | Biosensor test - | 8             | 126           | 134   |
|                                                                                |                  | Total            | 30            | 128           | 159   |
|                                                                                | No               | Biosensor test + | RT-PCR test + | RT-PCR test - | Total |
|                                                                                |                  | 60               | 6             | 66            |       |
|                                                                                |                  | Biosensor test - | 41            | 1,307         | 1,348 |
|                                                                                |                  | Total            | 101           | 1,313         | 1,414 |
| Interval between sampling and last contact with index case [days] <sup>@</sup> | < 5              | Biosensor test + | RT-PCR test + | RT-PCR test - | Total |
|                                                                                |                  | 15               | 1             | 16            |       |
|                                                                                |                  | Biosensor test - | 5             | 132           | 137   |
|                                                                                |                  | Total            | 20            | 133           | 153   |
|                                                                                | 5                | Biosensor test + | RT-PCR test + | RT-PCR test - | Total |
|                                                                                |                  | 52               | 5             | 57            |       |
| Biosensor test -                                                               |                  | 33               | 1,005         | 1,038         |       |
|                                                                                | Total            | 85               | 1,010         | 1,095         |       |
| > 5                                                                            | Biosensor test + | RT-PCR test +    | RT-PCR test - | Total         |       |
|                                                                                | 9                | 1                | 10            |               |       |
|                                                                                | Biosensor test - | 4                | 191           | 195           |       |
|                                                                                | Total            | 13               | 192           | 205           |       |

43 <sup>#</sup> Symptoms were not available from 24 individuals

44 <sup>s</sup> The infectiousness viral load cut-off, defined as the viral load above which 95% of RT-PCR test positives had a  
 45 positive culture, was 5.2 log<sub>10</sub> E gene copies/mL.

46 <sup>@</sup> The interval between the moment of sampling and the last contact with an index case was not available for 143  
 47 individuals, mainly because this question was added to the questionnaire later in study.

**Supplementary Figure 1 Diagnostic accuracy parameters of Ag-RDTs in asymptomatic close contacts, i.e., without symptoms at sampling for different viral load cut-offs. Points highlighted in red indicate a viral load cut-off of 5.2 log<sub>10</sub> SARS-CoV-2 E-gene copies/mL, which was considered the infectiousness viral load cut-off determined by viral culture.**

**Veritor rapid antigen test**

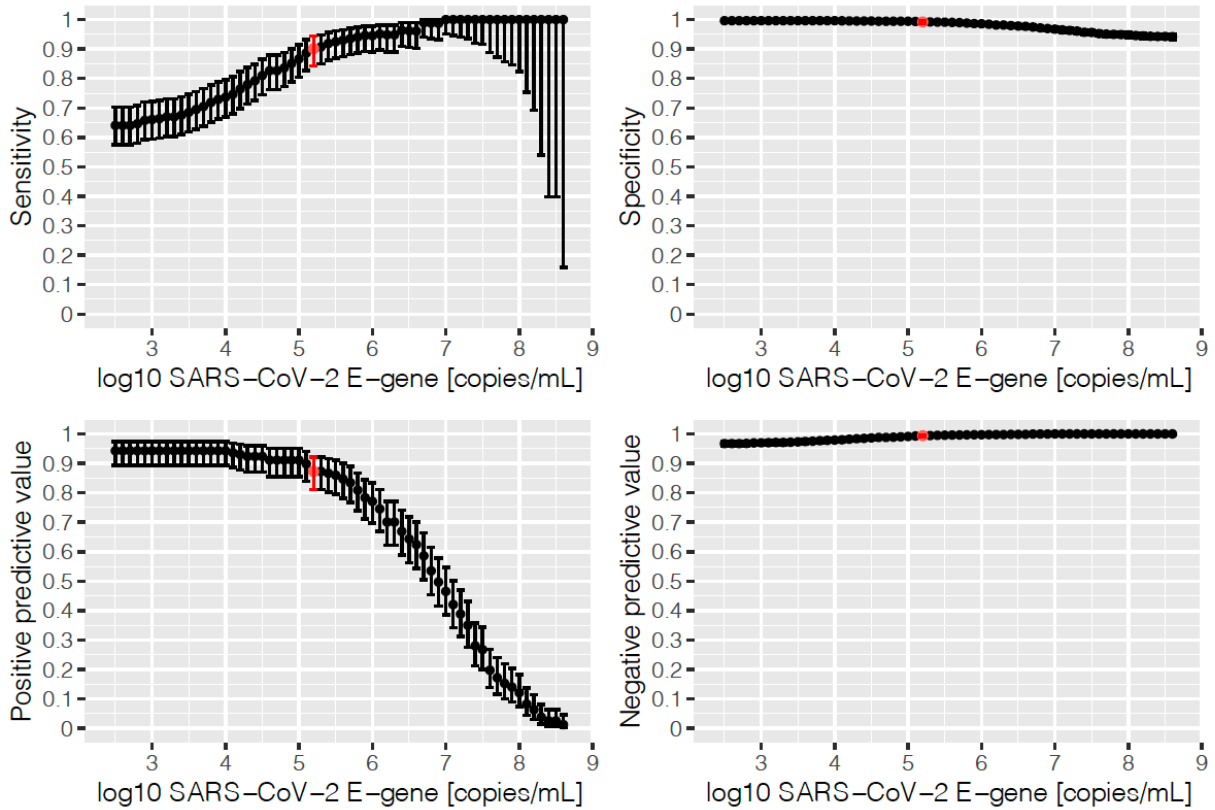

**Biosensor rapid antigen test**

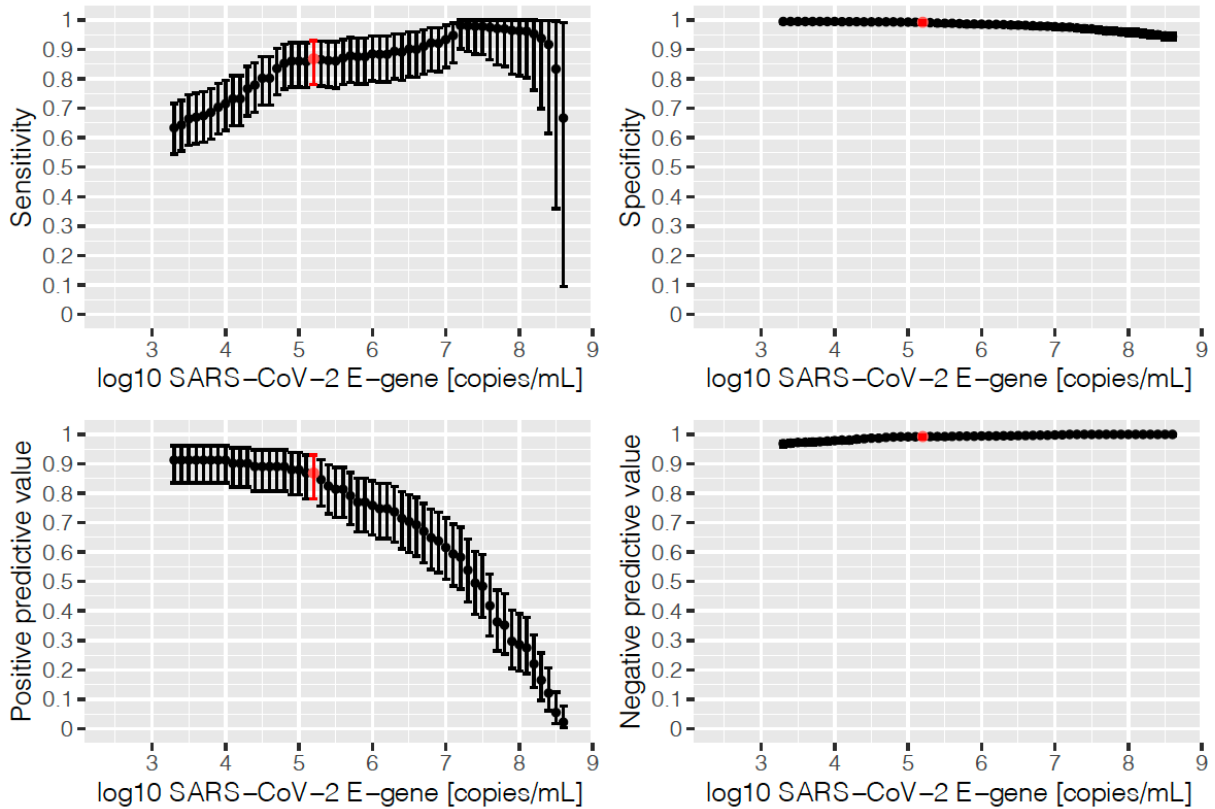

49  
50  
51  
52  
53  
54  
55  
56  
57  
58  
59  
60  
61  
62  
63  
64  
65  
66  
67  
68  
69  
70  
71  
72  
73  
74  
75  
76

**Supplementary Material 1: short questionnaire (translated from Dutch)**

**3-item questionnaire used between 14 December and 19 December 2020 (West-Brabant region) and 15 December and 18 December 2020 (city of Rotterdam).**

**Short questionnaire on COVID-19 like symptoms and reason for testing**

1. At this moment, do you have any COVID-19 like symptoms?  
 No *END OF QUESTIONNAIRE*  
 Yes
  
2. What COVID-19 like symptoms do you currently have?  
*Multiple answers possible*  
 Common cold  
 Shortness of breath  
 Fever  
 Coughing  
 Loss of taste or smell  
 Muscle ache  
 I have other symptoms
  
3. What was the moment you first experienced these symptoms?  
 Today  
 Yesterday  
 Two days ago  
 Three or more days ago

77 **5-item questionnaire used from December 19 (city of Rotterdam) and 20 (West-Brabant region) onwards**

78

79 **Short questionnaire on COVID-19 like symptoms and reason for testing**

80

81 1. What is the reason for testing?

82 *Multiple answers possible*

83  Received notification by public health service (by phone or letter)

84  Received notification by CoronaMelder app (English: Corona notification app)

85  Received notification by SARS-CoV-2 infected person

86  None of the above, requested test because of a SARS-CoV-2 infected person in my immediate  
87 surroundings

88

89 2. When was your last contact with the infected person?

90 Date: \_\_\_ - \_\_\_ - 20\_\_\_ (*day – month – year*)

91

92 3. At this moment, do you have any COVID-19 like symptoms?

93  No **END OF QUESTIONNAIRE**

94  Yes

95

96 4. What COVID-19 like symptoms do you currently have?

97 *Multiple answers possible*

98  Common cold

99  Shortness of breath

100  Fever

101  Coughing

102  Loss of taste or smell

103  Muscle ache

104  I have other symptoms

105

106 5. What was the moment you first experienced these symptoms?

107  Today

108  Yesterday

109  Two days ago

110  Three or more days ago

111 **Supplementary Material 2: Specimen collection, SARS-CoV-2 diagnostic testing, and**  
112 **SARS-CoV-2 virus culture procedures**

113

114 **Specimen collection and SARS-CoV-2 diagnostic testing procedures**

115 Procedures were performed in accordance with standard operating procedures of the public health service and the  
116 two laboratories, and the laboratories followed quality management standard ISO15189:2012.

117

118 *West-Brabant: RT-PCR test and Veritor system Ag-RDT*

119 Two swabs were taken per participant. The first swab was a combined oropharyngeal- and nasal swab (2.5 cm  
120 deep from the edge of the nostril) that was placed in universal transport medium (HiViral™) with MagnaPure  
121 LC lysis- and binding buffer (LBB) (Roche Diagnostics Netherlands, Almere, The Netherlands) and transported  
122 to Microvida location Roosendaal laboratory for RT-PCR testing. RT-PCR testing was performed using the cobas®  
123 SARS-CoV-2 test on the cobas® 8800 platform (Roche Diagnostics International, Rotkreuz, Switzerland). This  
124 RT-PCR test has two targets: The E-gene and RdRp-gene. The viral load in genome copies/ml was calculated  
125 based on an in-house established standard curve. The second swab was a combined oropharyngeal- and nasal swab  
126 (2.5 cm deep) and was placed in a sterile dry tube and frozen at -20°C within 30 minutes after collection before  
127 transportation to the Microvida location Amphibia laboratory. There, after allowing the specimen to thaw, a trained  
128 laboratory technician performed the BD Veritor System (Becton Dickinson, Franklin Lakes, NJ) in accordance  
129 with the manufacturer's operating procedure within 6 hours after the specimen was obtained. The Veritor Ag-RDT  
130 is a chromatographic immunoassay intended for the direct and qualitative detection of SARS-CoV-2 nucleocapsid  
131 antigens in nasal swabs from individuals who are suspected of COVID-19 within the first 5 days of symptom  
132 onset. The system is intended to be used with a digital reader although validated for visual reading<sup>1</sup>; we used visual  
133 reading.

134 Interpretation and recording of RT-PCR test results was performed according to the manufacturer's instructions  
135 and a trained technician. In case of discrepancies a second in house RT-PCR was performed for confirmation.<sup>2</sup>  
136 Results from the Ag-RDT were interpreted and recorded by two persons visually and in case of discrepancies the  
137 result from the digital reader was used.

138

139 *Rotterdam: RT-PCR test and Biosensor Ag-RDT*

140 Two swabs were taken per participant. First, one combined oro- and nasopharyngeal swab (>5 cm deep from the  
141 edge of the nostril) was taken for RT-PCR testing, placed directly in universal transport media (HiViral™) and  
142 shipped to the Erasmus MC Viroscience diagnostic laboratory. Routine RT-PCR testing was performed on the  
143 combined oro- and nasopharyngeal swab in virus transport medium using the cobas® SARS-CoV-2 test on the  
144 cobas 6800® platform (Roche Diagnostics International, Rotkreuz, Switzerland). Genome copies/ml was  
145 calculated based on an in house established standard curve. The virus transport medium from the same oro- and  
146 nasopharyngeal swab was also directly inoculated onto Vero cells clone 118, without prior freezing.<sup>3</sup>

147 A second nasopharyngeal swab (>5 cm deep from the edge of the nostril) was taken subsequently from the same  
148 nostril using the swab included in the kits for the Biosensor test (Roche Diagnostics, Basel, Switzerland). This test  
149 was carried out immediately on-site following manufacturer's instructions.

150 Interpretation and recording of RT-PCR test and Ag-RDT results was performed independently by two persons  
151 according to the manufacturer's instructions. In case of discrepancies, the results were additionally interpreted by  
152 a laboratory specialist.

153

154 **Output amplification**

155 During the study period, the Veritor and Biosensor test were applied according to manufacturer instructions, as  
156 such no output amplification methods were used.

157

158 **SARS-CoV-2 virus culture**

159 At the Erasmus MC Viroscience diagnostic laboratory, samples of Rotterdam participants with a positive RT-PCR  
160 test result were inoculated onto Vero cells, and incubated for seven days. Once cytopathic effects were visible, the  
161 presence of SARS-CoV-2 virus was confirmed with immunofluorescent detection of its nucleocapsid protein  
162 (Rabbit polyclonal antibody Sino Biological inc., Eschborn, Germany). Samples from participants from West-  
163 Brabant were not cultured.

164

165 **Viral load calculation**

166 SARS-CoV-2 RT-PCR tests were conducted in two laboratories (Erasmus Medical Center Viroscience diagnostic  
167 laboratory and Microvida) that use similar RT-PCR platforms (cobas 6800 and 8800 at Erasmus Medical Center  
168 Viroscience diagnostic laboratory and Microvida respectively), but SARS-CoV-2 viral culture in only one of those  
169 two laboratories (Erasmus Medical Center Viroscience diagnostic laboratory). Since Ct-values often differ  
170 between laboratories, several steps were indeed undertaken to enable conversion of laboratory-specific SARS-



171 CoV-2 RT-PCR Ct values into standardised SARS-CoV-2 viral loads and viral load cut-off for virus culturability.  
172 At the Erasmus Medical Center Viroscience diagnostic laboratory a first standard curve was created by testing  
173 dilutions of a publicly available quantified SARS-CoV-2 E-gene transcript (European Virus Archive EVAg<sup>4</sup>) using  
174 the RT-PCR protocol described by Corman et al.<sup>5</sup> The relationship between this E-gene RT-PCR Ct-value and E-  
175 gene copies/ml was determined by linear regression analysis. Subsequently, this E-gene standard curve was used  
176 to create a second standard derived from cell-cultured SARS-CoV-2 virus. Dilutions of this second standard were  
177 used to prepare a secondary standard curve by linear regression this standard curve was used to convert Ct values  
178 obtained from participant samples to SARS-CoV-2 viral loads (copies/ml). To determine whether the two cobas  
179 PCR platforms provided comparable data, both laboratories tested the same SARS-CoV-2 viral load panel obtained  
180 from the National Public Health Institute (RIVM). The Ct values generated in the two laboratories corresponded  
181 well. A linear regression model with Ct value as the outcome, and laboratory (Erasmus Medical Center Viroscience  
182 diagnostic laboratory or Microvida) and viral load as covariates indicated that the laboratory was not associated  
183 with the Ct value (p = 0.29). In a separate linear regression model, no evidence of an interaction between the  
184 laboratory and viral load was found (p-value for interaction = 0.86). A conversion factor was taken into account  
185 to correct for differences in initial sample volume and RT-PCR dilutions steps. The specific mathematical formulas  
186 to calculate the viral load (copies/mL) from Ct-values were  $62.5 * e^{\frac{43.1-Ct}{1.607}}$  for Rotterdam, and  $62.5 * e^{\frac{43.1-Ct}{1.607}} / 3^{\frac{1}{3}}$   
187 for West-Brabant, where in West-Brabant the viral loads were divided by a factor  $3^{\frac{1}{3}}$  to account for the lower  
188 volume of medium used per swab by Microvida (1.8 mL) as compared to Erasmus MC (6 mL). The infectiousness  
189 viral load cut-off was defined as the viral load above which 95% of RT-PCR test positives showed *in vitro*  
190 infectivity in cell culture.  
191

192 **References**

193  
194  
195  
196  
197  
198  
199  
200  
201  
202  
203  
204  
205  
206  
207  
208  
209  
210

1. Van der Moeren NZ, V.F.; Lodder, E.B.; van den Bijllaardt, W.; van Esch, H.R.J.M.; Stohr, J.J.J.M.; Pot, J.; Welschen, I.; van Mechelen, P.M.F.; Pas, S.D.; Kluytmans, J.A.J.W.;. Performance evaluation of a SARS-CoV-2 Rapid antigen test: test performance in the community in The Netherlands. *medRxiv* 2020
2. Kluytmans-van den Bergh MFQ, Buiting AGM, Pas SD, et al. Prevalence and Clinical Presentation of Health Care Workers With Symptoms of Coronavirus Disease 2019 in 2 Dutch Hospitals During an Early Phase of the Pandemic. *JAMA Netw Open* 2020;3:e209673. doi: 10.1001/jamanetworkopen.2020.9673
3. van Kampen JJA, van de Vijver D, Fraaij PLA, et al. Duration and key determinants of infectious virus shedding in hospitalized patients with coronavirus disease-2019 (COVID-19). *Nat Commun* 2021;12:267. doi: 10.1038/s41467-020-20568-4
4. Archive EV. Wuhan coronavirus 2019 E gene control 2020 [Available from: <https://www.european-virus-archive.com/nucleic-acid/wuhan-coronavirus-2019-e-gene-control> accessed June 8 2021 2021.
5. Corman VM, Landt O, Kaiser M, et al. Detection of 2019 novel coronavirus (2019-nCoV) by real-time RT-PCR. *Euro Surveill* 2020;25
